# Supplementary material
Source: ML conference proceedings conference paper supplement (https://proceedings.neurips.cc/paper_files/paper/2022/hash/5fcd540792da599adf1b932624e98f1f-Abstract.html)
Supplement: Supplementary file 1 [file 5fcd540792da599adf1b932624e98f1f-Supplemental-Conference.zip]

Archive with 3 entries (2 files):
- RIDDLE_Supplementary/
- RIDDLE_Supplementary/appendix.pdf
- __MACOSX/RIDDLE_Supplementary/._appendix.pdf
